# Supplementary material
Source: publisher figshare collection journal article supplement (https://acs.figshare.com/ndownloader/files/11272376)
Supplement: Supplementary file 1 [file 11272376]

## Supplementary Information

### Discovery of a Kojibiose Phosphorylase in *Escherichia coli* K-12

Keya Mukherjee<sup>Φ</sup>, Tamari Narindoshvili<sup>Ψ</sup>, and Frank M. Raushel<sup>Φ,Ψ,\*</sup>

<sup>Φ</sup>Department of Biochemistry & Biophysics, Texas A&M University, College Station, Texas, 77844, USA.

<sup>Ψ</sup>Department of Chemistry, Texas A&M University, College Station, Texas 77842, USA

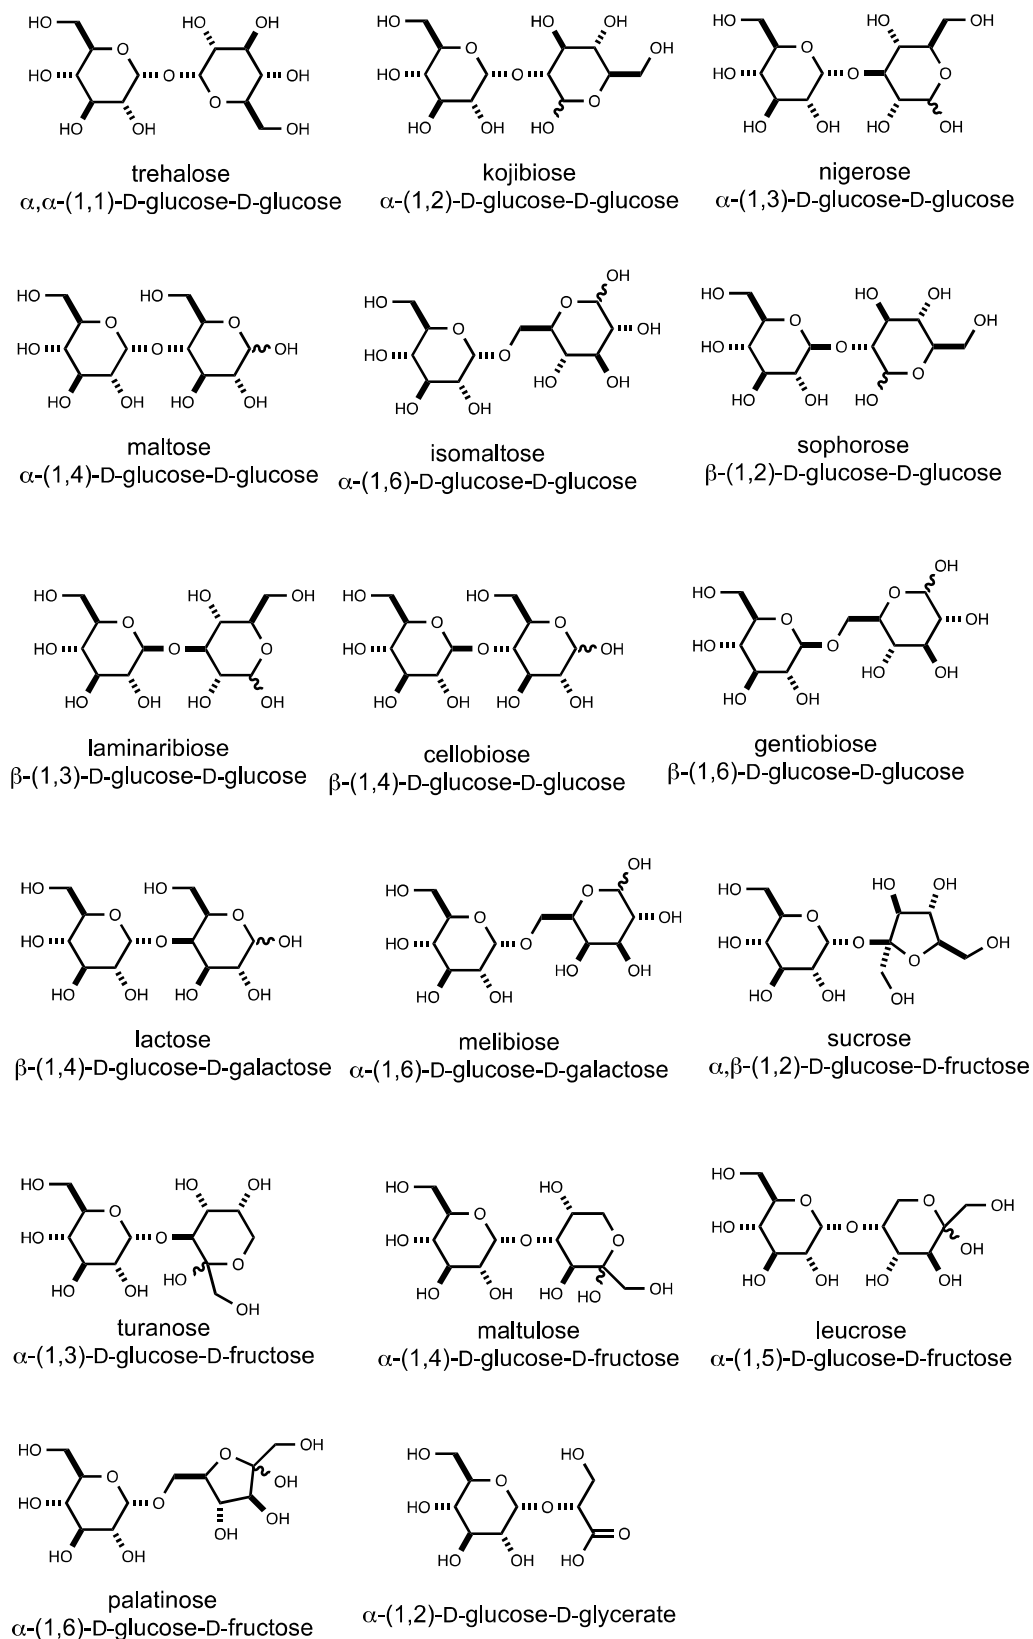

**Scheme S1:** Structures of disaccharides tested as substrates for YcjM and YcjT.

### Aldoses

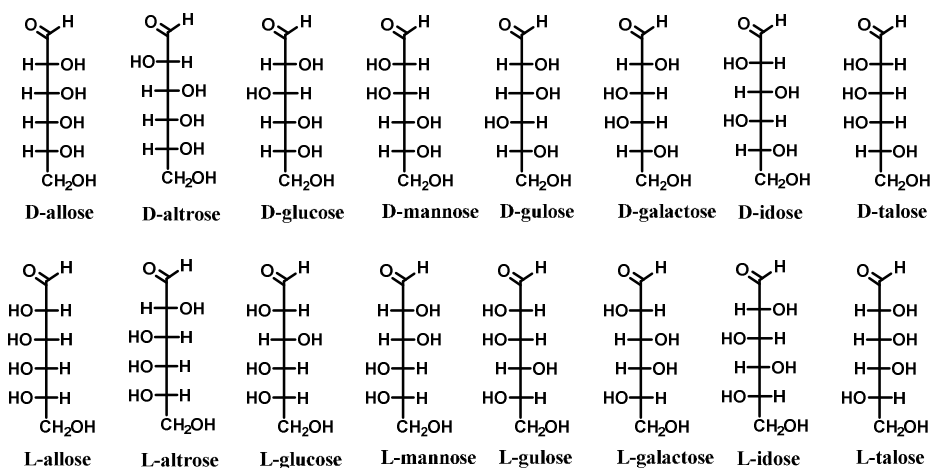

### Pentoses

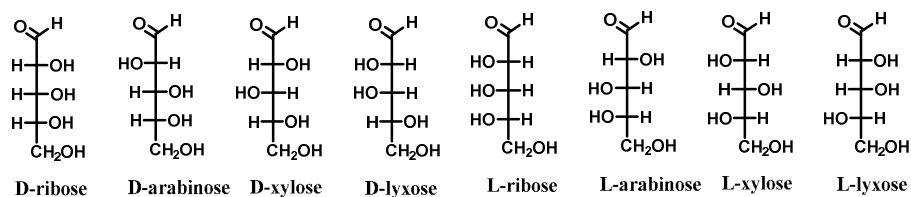

### Hexo-ketoses

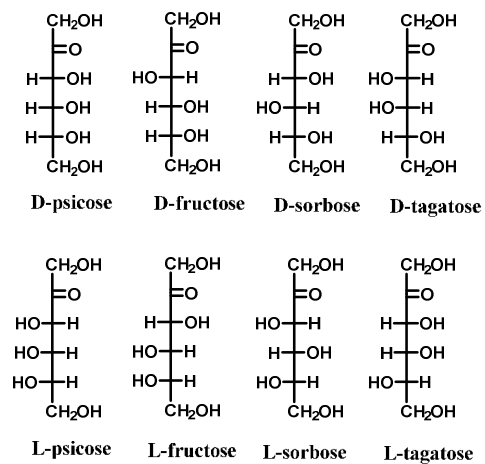

**Scheme S2:** Structure of aldohexoses, aldopentoses, and ketohexoses tested as substrates for YcjM and YcjT.

### 6-deoxy hexoses

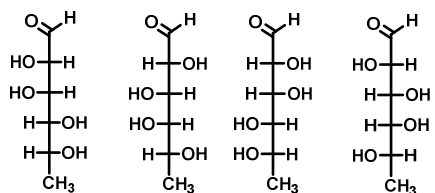

D-rhamnose D-fucose L-rhamnose L-fucose

### Pento-ketoses

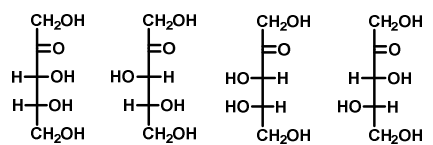

D-ribulose D-xylulose L-ribulose L-xylulose

### Carboxy sugars

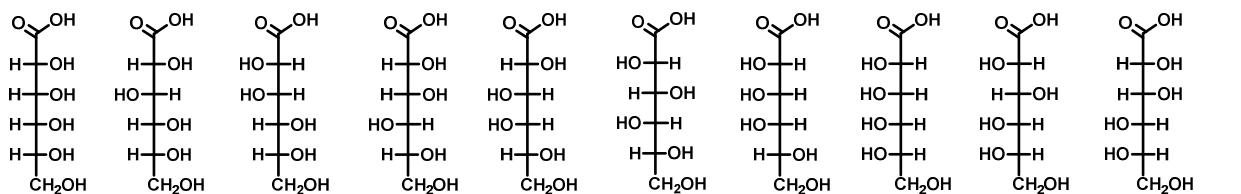

D-allonate D-gluconate D-mannonate D-gulonate D-galactonate D-idonate D-talonate L-allonate L-gluconate L-mannonate

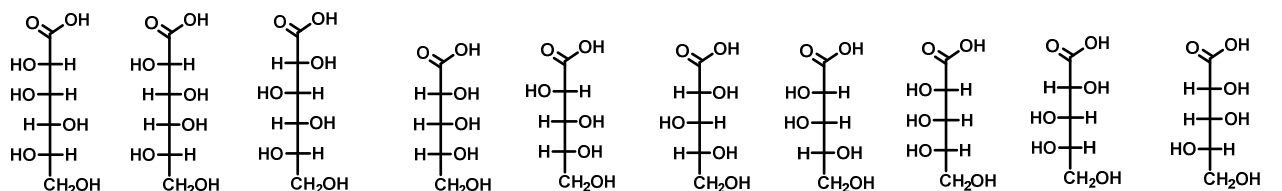

L-gulonate L-galactonate L-idonate D-ribonate D-arabinonate D-xyloate D-lyxonate L-ribonate L-arabinonate L-lyxonate

### Sugar alcohols

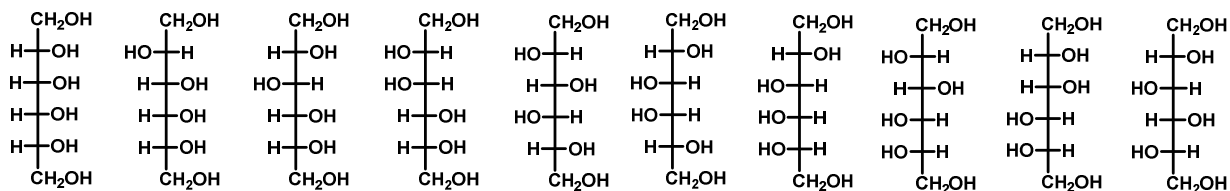

allitol D-altritol/  
D-tallitol D-glucitol/  
D-sorbitol D-mannitol D-iditol D-galactitol L-altritol/  
L-tallitol L-glucitol/  
L-sorbitol L-mannitol L-iditol

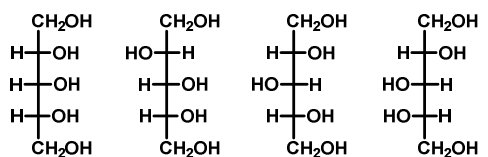

D-ribitol D-arabitol D-xylytol L-arabitol

**Scheme S3:** Structures of 6-deoxyaldoses, ketopentoses, sugar carboxylates and sugar alcohols tested as substrates for YcjM and YcjT.

### Inositols

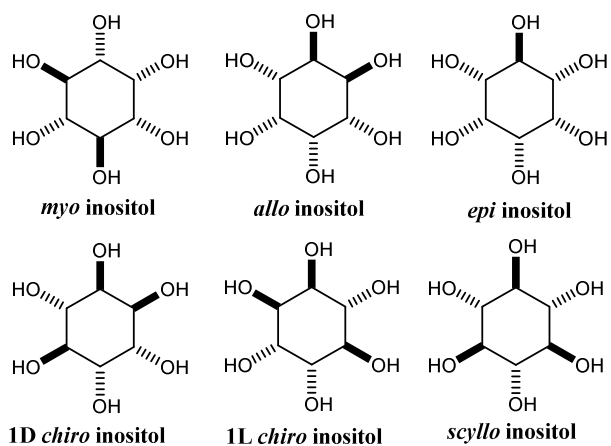

### Deoxy-glucose substrates

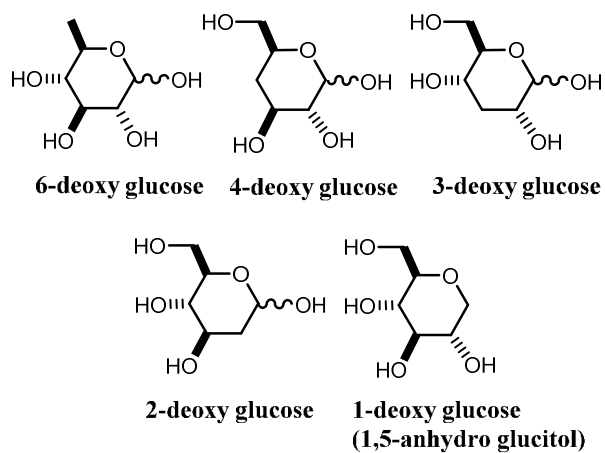

**Scheme S4:** Structures of deoxy-D-glucose variants and inositols tested as substrates for YcjM and YcjT.

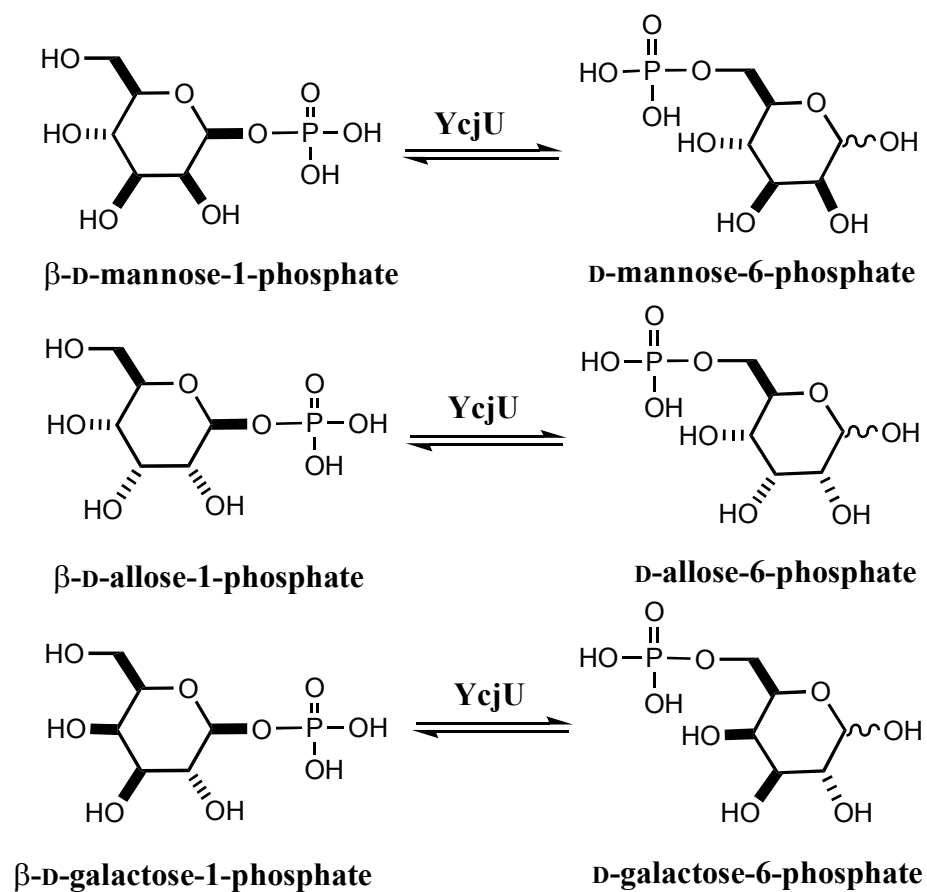

**Scheme S5:** Reactions catalyzed by YcjU.

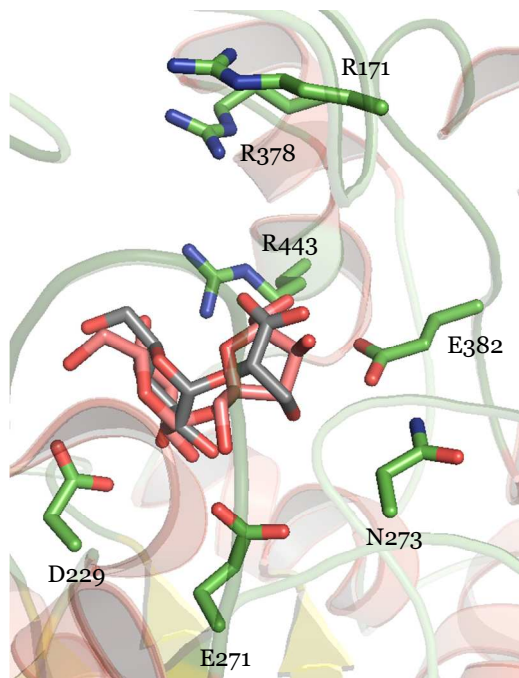

**Figure S1:** Homology model for active site of YcjM built using Phyre2. The  $\alpha$ -(1,2)-D-glucose-D-glycerate was docked in the active site using AutoDock Vina. The YcjM model is superimposed with sucrose phosphorylase structure from *B. adolescentis* (PDB id: 2GDU). The bound sucrose is shown in red. In the YcjM model,  $\alpha$ -(1,2)-D-glucose-D-glycerate is shown in grey and the active site residues of YcjM are shown in green.

|      |     |                                                                                 |     |
|------|-----|---------------------------------------------------------------------------------|-----|
| YcjT | 1   | -----MTRPVTLSSEPHFSQHTLNKYASLMAQNGYLGLRASHEEDYTRQTRGMYLAGLYHRAGKGEIN            | 63  |
| PhKP | 1   | -----MRFQFGFSKEDEQVLGTILTLGNQGLGVRGEFEL--ERSPYGTIVSGVYDYT-PYFYR                 | 55  |
| CsKP | 1   | -----MKLSEREWLIEQDKL--EASGKFETCFALTNGYIGIRGINEEVFCEETPGTYIAGVFDKS-TAQVT         | 63  |
| TbKP | 1   | MVKHMFLEDVNNLISDDKWLIFQNEYNTEVNPRTYETLTLTNGYMGVVRGTFEEGSEGERSGNFIAGIFDKS-DAQVR  | 76  |
| YcjT | 64  | ELVNLPDVVGMEIAINGEVFSLSH--EAWQRELDFASELRRNVVWRTSNGSGYTIASRRFVSADQLPLIALEITI     | 137 |
| PhKP | 56  | ELVNGPRTIGMIIIDGELINPSSQKVKEFQRELDIEKGLLRTHLEIETKNGNKILYKSTRIVHMKRKNLILDFEL     | 132 |
| CsKP | 64  | ELVNLPNPIGLRIYINREFLNPLKCEILEFKRVLDLKQGLYRKLRKLDVKGRITTIIEGFRFVSMNNKNLIVQKYDV   | 140 |
| TbKP | 77  | EIVNAQNWLRIKLYVEGEELSLDKQLIEFKRILDMKKGILFRSMLIKDSKDRITRIEGRYFISRSDLHRSAILKLFV   | 153 |
| YcjT | 138 | TPLDADASVLISTGIDATQTNHGRQH-----LDETQVRVFGQHLMQGSYTTQDGRSDVAISCCCKVSGD-----VQ    | 203 |
| PhKP | 133 | KASK-GGIAVVVNPIEFNTANPGFIDEIMIKHYRVDSIKET-EEGVYARVKTLDNKYTLEIASSLVPEYTSR----    | 203 |
| CsKP | 141 | VCENYSAVLNVESFIDATTVNSKDVNDVRVHYEIDKKKDF-ADGIYLGITTKDKKYKVGIASSTKVLN-----NQ     | 211 |
| TbKP | 154 | TPVNYSGVVGIESIDGTVLNSADSPKRVKHLKVADNSSLNKSQVYLETATIDDDIRIATGSAVRLYHYEDKEKNV     | 230 |
| YcjT | 204 | QCYTAKERRL-----QHTSAQLHAGETMTLQKLWIDWRDDRQAALDEWGSASLRQLEMCAQQSYDQLLAASTENW     | 275 |
| PhKP | 204 | -STFR-TDNEIG-----EIIIVKLKPGKTYKFTKYVTV-----SKGALEELKDKVKRLGFEKLYEEHINSW         | 262 |
| CsKP | 212 | RCYFNRTKDLGYIITENFEVEAKQGERYEIEKLTVLVS--SREKNVGDVFETCTNKLKEFETKSAEKLLEFHEIEY    | 286 |
| TbKP | 231 | IAKFKEF-LPLGEMSEIEYFEFDGTENKTVVIDKFIITYT--SRDVKKGLLKSTVEKELFAFAGEGIDKELQRHIEVY  | 304 |
| YcjT | 276 | RQWWQKRRITVNGGEAHDQALDYALYHLRIMTPAHERSSIAAKGLTGEGYKGHVFWDTTEVFLLPFHLFSDPTVAR    | 352 |
| PhKP | 263 | KRIWEKVKVEIEGDKDL-ENALNFNIFHLIQSLPPTD-KVSLPARGIHGFGYRGHIFWDTTEIYALPFFIFTMPKEAR  | 337 |
| CsKP | 287 | KRLWDVANIDIVGDEVA-NKSVKFNIFHLISMANPEDEHVSGLGAKGLHGEYKGHVFWDTTEIFMLPFYIYTNPAKAK  | 362 |
| TbKP | 305 | EELWSVADINIEGDEEA-DKALRFNIFHLMSSVNNENDPMVSIKALHGEYKGHVFWDTTEIFMLPFFIYVHPKAAK    | 380 |
| YcjT | 353 | SLRLRYRWHNLPGAQEKARRNGWQALFPWESARSGEETPEFAAINIRTGLRQKVASAQAEHHLVADIWAVIQQYQ     | 429 |
| PhKP | 338 | RLLLYRCNNLDAAKENAKMNGYQGVQFPWESADDGREATPSEIPLDMLGRKIVRIYTGEEHHITADIAIVDFYYQ     | 414 |
| CsKP | 363 | AMLMYRYNLLDAARENARKNGYKGAQFPWESADTGEETPK-WGYDYLG-NPVRIWTGDIETHISADIAYAVMNYVR    | 437 |
| TbKP | 381 | TLLMYRYNMLDAARKNAALNGYKGAQYPWESADTGEETPK-WGPDYMG-NPVRIWTGDLHHITADIAFAVWEYFR     | 455 |
| YcjT | 430 | TTGDESFAIEHEGMALLLETAKFWISRVR--VNDRLIEHDVIGPDEYTHEVNNNAYTSYMARYNVQALNIARQFC     | 504 |
| PhKP | 415 | VSGDLEFMNRCGLEIIFETARFWASRVEFEKG-GYVIKKGIVGPDEYTHEVNNNFFTNLMAKHNLLEAIRYFRE--S   | 488 |
| CsKP | 438 | ATDDIDFLNLYGSEIIFETARFWASICKYNKEKGRYEINDVIGPDEFHEHCNNNAYTNYLAKWNLKASELCNLLLE    | 514 |
| TbKP | 456 | ATEDIEFMLNYGAEVIFETARFWVSRCEYVKELDRYEINNVIIGPDEFHEHVDNNAYTDYLAKWNIKKGLELINMLKE  | 532 |
| YcjT | 505 | SDDAFI-----HRAEMFLKELWMPFIQPDGVLPQDDSFMAKPAINLAKYKAAAGKQTI--LLDYSRAEV           | 566 |
| PhKP | 489 | KNREPWKKIVEKLNIREEEVEKWEI IAKNMYIPRKID-GVFEEDGYFELMDFEVDPFNIG--EKTLE-PEEI-RNNI  | 560 |
| CsKP | 515 | KYPKYFEKLSKKINLSDEEPFVQEI IASKIYIPYHPDKKLEIQFEGYFNLKDFVIKEYDQN--NMPVWPEGVELDKL  | 589 |
| TbKP | 533 | KYPEHYHAISNKKCLTNEEMEKWEVEEKIYIPYDKDKKLEIQFEGYFDKDYVIDKFDEN--NMPIWPEGVDITKL     | 607 |
| YcjT | 567 | NEMQILKQADVVMNLNYLMEQFSAASCLANLQFYEPRTIHDSSLSKAIHGIVAARCGLLTQSYQFWREGTEIDLGA    | 643 |
| PhKP | 561 | GKTKLVKQADVIMAQVLLKDYFSPEEIKSNFNYYIRRTTHASSLSMPPYAIATWIGEVKIAEYFKRCANIDLKNV     | 637 |
| CsKP | 590 | NNYQLIKQADVVMMLLYLLGEEFDDQTKKINYDYEEKRTMHKSSLSPSIYALMGVVRVGETNRAYINFMRTALTDLEDN | 666 |
| TbKP | 608 | GDTQLIKQADVVMMLMLLLGEEFDEETKRINYEYEEKRTMHKSSLSGPMYAIMGLKVGDKHKNAYQSFMRSANVDLVDN | 684 |
| YcjT | 644 | PHSCDDGIHAAATGAIWLGAIQGFAGVSVRD-GELHLNLPALPEQWQQLSFPLFWQGCELVTLDAQRIART--SA     | 716 |
| PhKP | 638 | YGNTAEGFHLATAGGTWQVLVRGFCGLNVKG-NKIELNPNLPEKWYVKFRIFFKGSWIEFKISRKKVRARMLEGR     | 713 |
| CsKP | 667 | QGNTHLGIHAASLGGTWQALVFGFGGISIEKDDVLSVNPWLPEKWESLKFSIWWKGNLLDFKITKDNVEVKKRVEKG   | 743 |
| TbKP | 685 | QGNTEGLHAASAGGTWQVVVFGFGGMEIDKEGALNINSWLPEKWDKLSYKVFWKGNLIEIVIVTKQEVTVKKLKGKG   | 761 |
| YcjT | 717 | PVSLRLNGQLITVAEESVF-CLGDFILPFNGTATKHQEDE                                        | 755 |
| PhKP | 714 | KVKISSFGKEVDLYPGKEVVIVAN-----                                                   | 737 |
| CsKP | 744 | NVKLKIKGQEAII-----                                                              | 756 |
| TbKP | 762 | NIKVKVGKELTIE-----                                                              | 775 |

**Figure S2:** Multiple sequence alignment of YcjT, and kojibiose phosphorylases from *Pyrococcus horikoshii* (PsKP), *Caldicellulosiruptor saccharolyticus* (CsKP), and *Thermoanaerobacter brockii* (TbKP) created using Clustal omega. The residues interacting with kojibiose, as observed in the CsKP structure (2IWW), are conserved in YcjT. These residues are indicated in pink. YcjT has Ser409 in place of a conserved threonine residues as indicated in blue. The catalytic glutamate residue is shown in green.
